# Supplementary material for: Complex Immunometabolic Profiling Reveals the Activation of Cellular Immunity and Biliary Lesions in Patients with Severe COVID-19
Source: MDPI journal article supplement (doi:10.3390/jcm9093000), 2020-09-17
Supplement: s1 [file s1]

**A**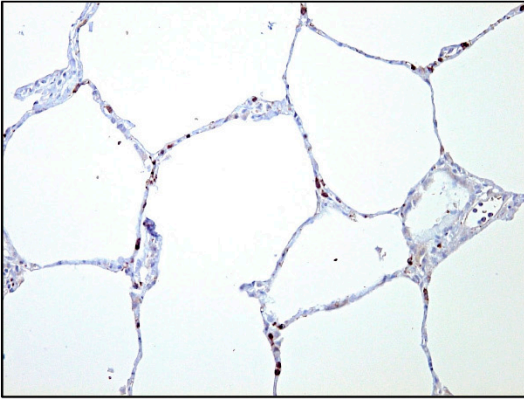**B**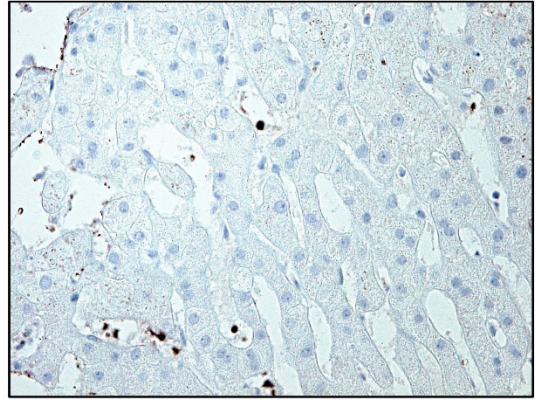

### Supplementary Figure 1 Healthy control biopsy

- A) Immunohistochemical staining of IL-6 in a healthy lung biopsy (20x magnification).
- B) Immunohistochemical staining of IL-6 in healthy liver biopsy (40x magnification) showing sparse IL-6-producing cells within capillaries of liver lobules.
